# Supplementary material
Source: publisher figshare collection journal article supplement (https://diabetesjournals.figshare.com/articles/dataset/_/12753533)
Supplement: Supplementary file 1 [file 1]

Online Supplemental Figure 2.

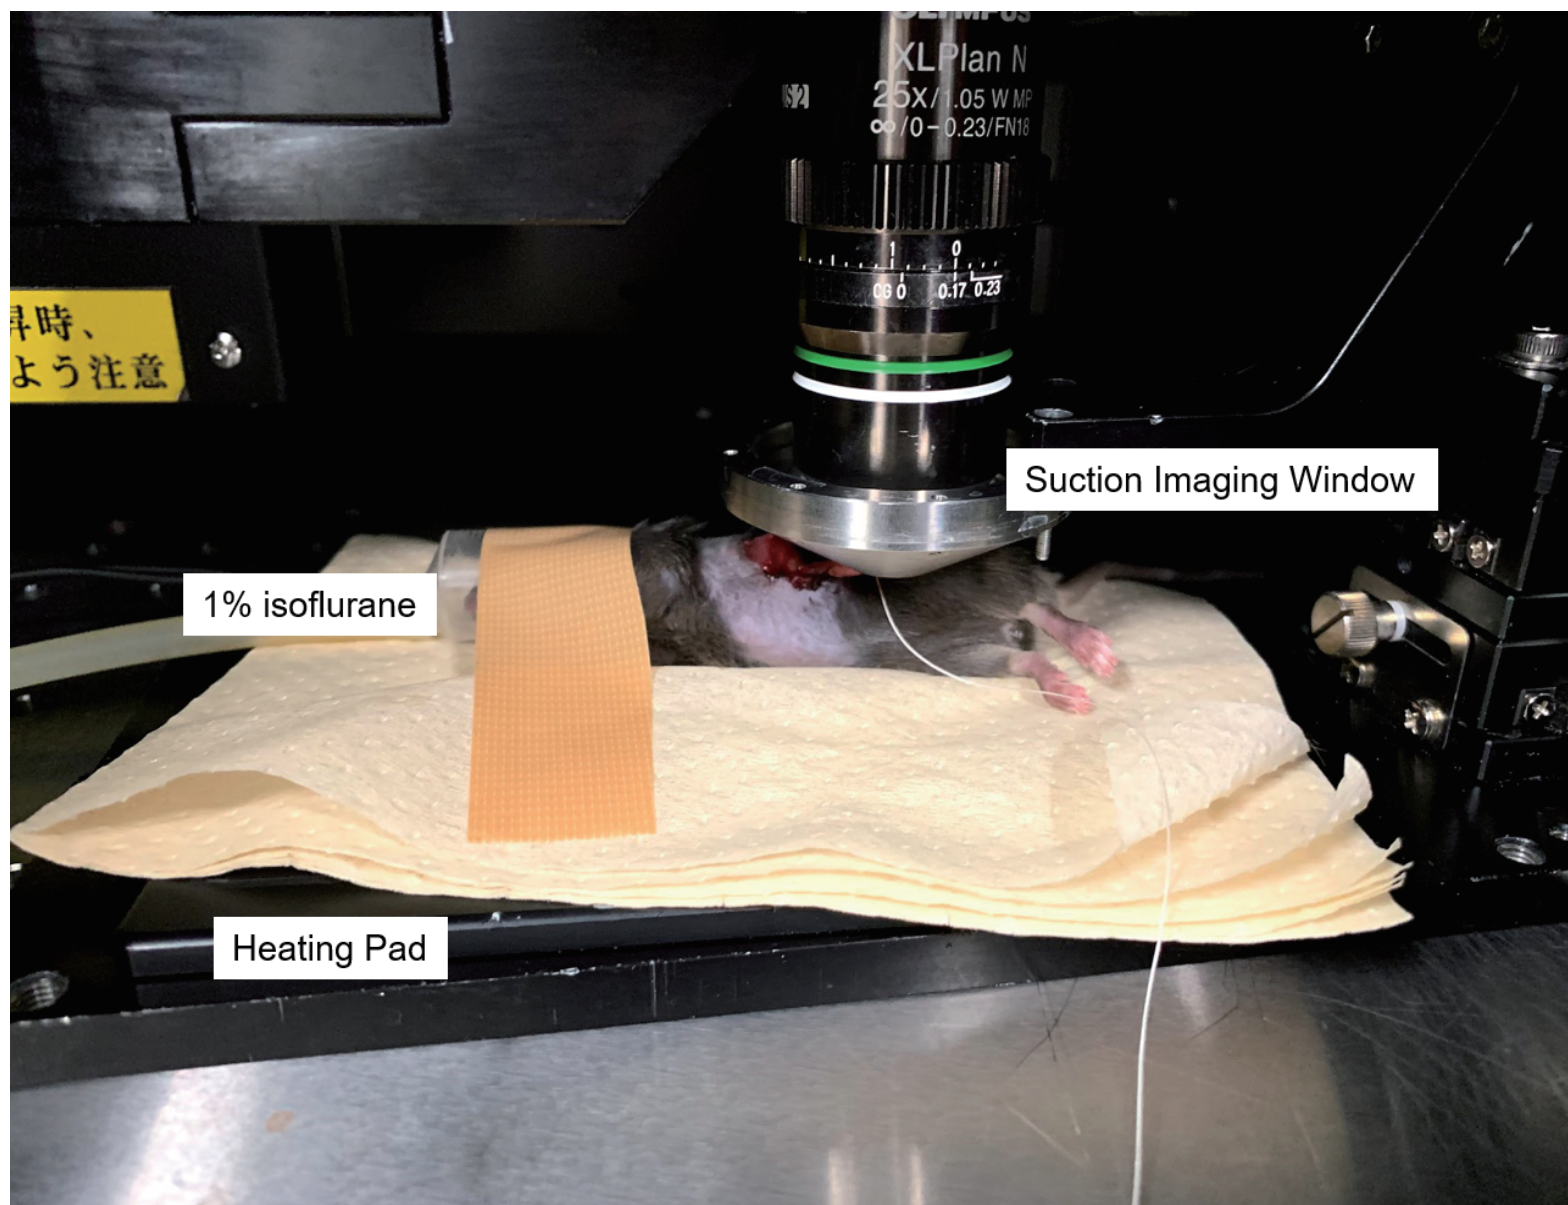

Online Supplemental Figure 2. Experimental setup of intravital pancreas imaging by two-photon microscopy.
