# Supplementary material
Source: publisher figshare collection journal article supplement (https://diabetesjournals.figshare.com/articles/dataset/_/12753533)
Supplement: Supplementary file 2 [file 1]

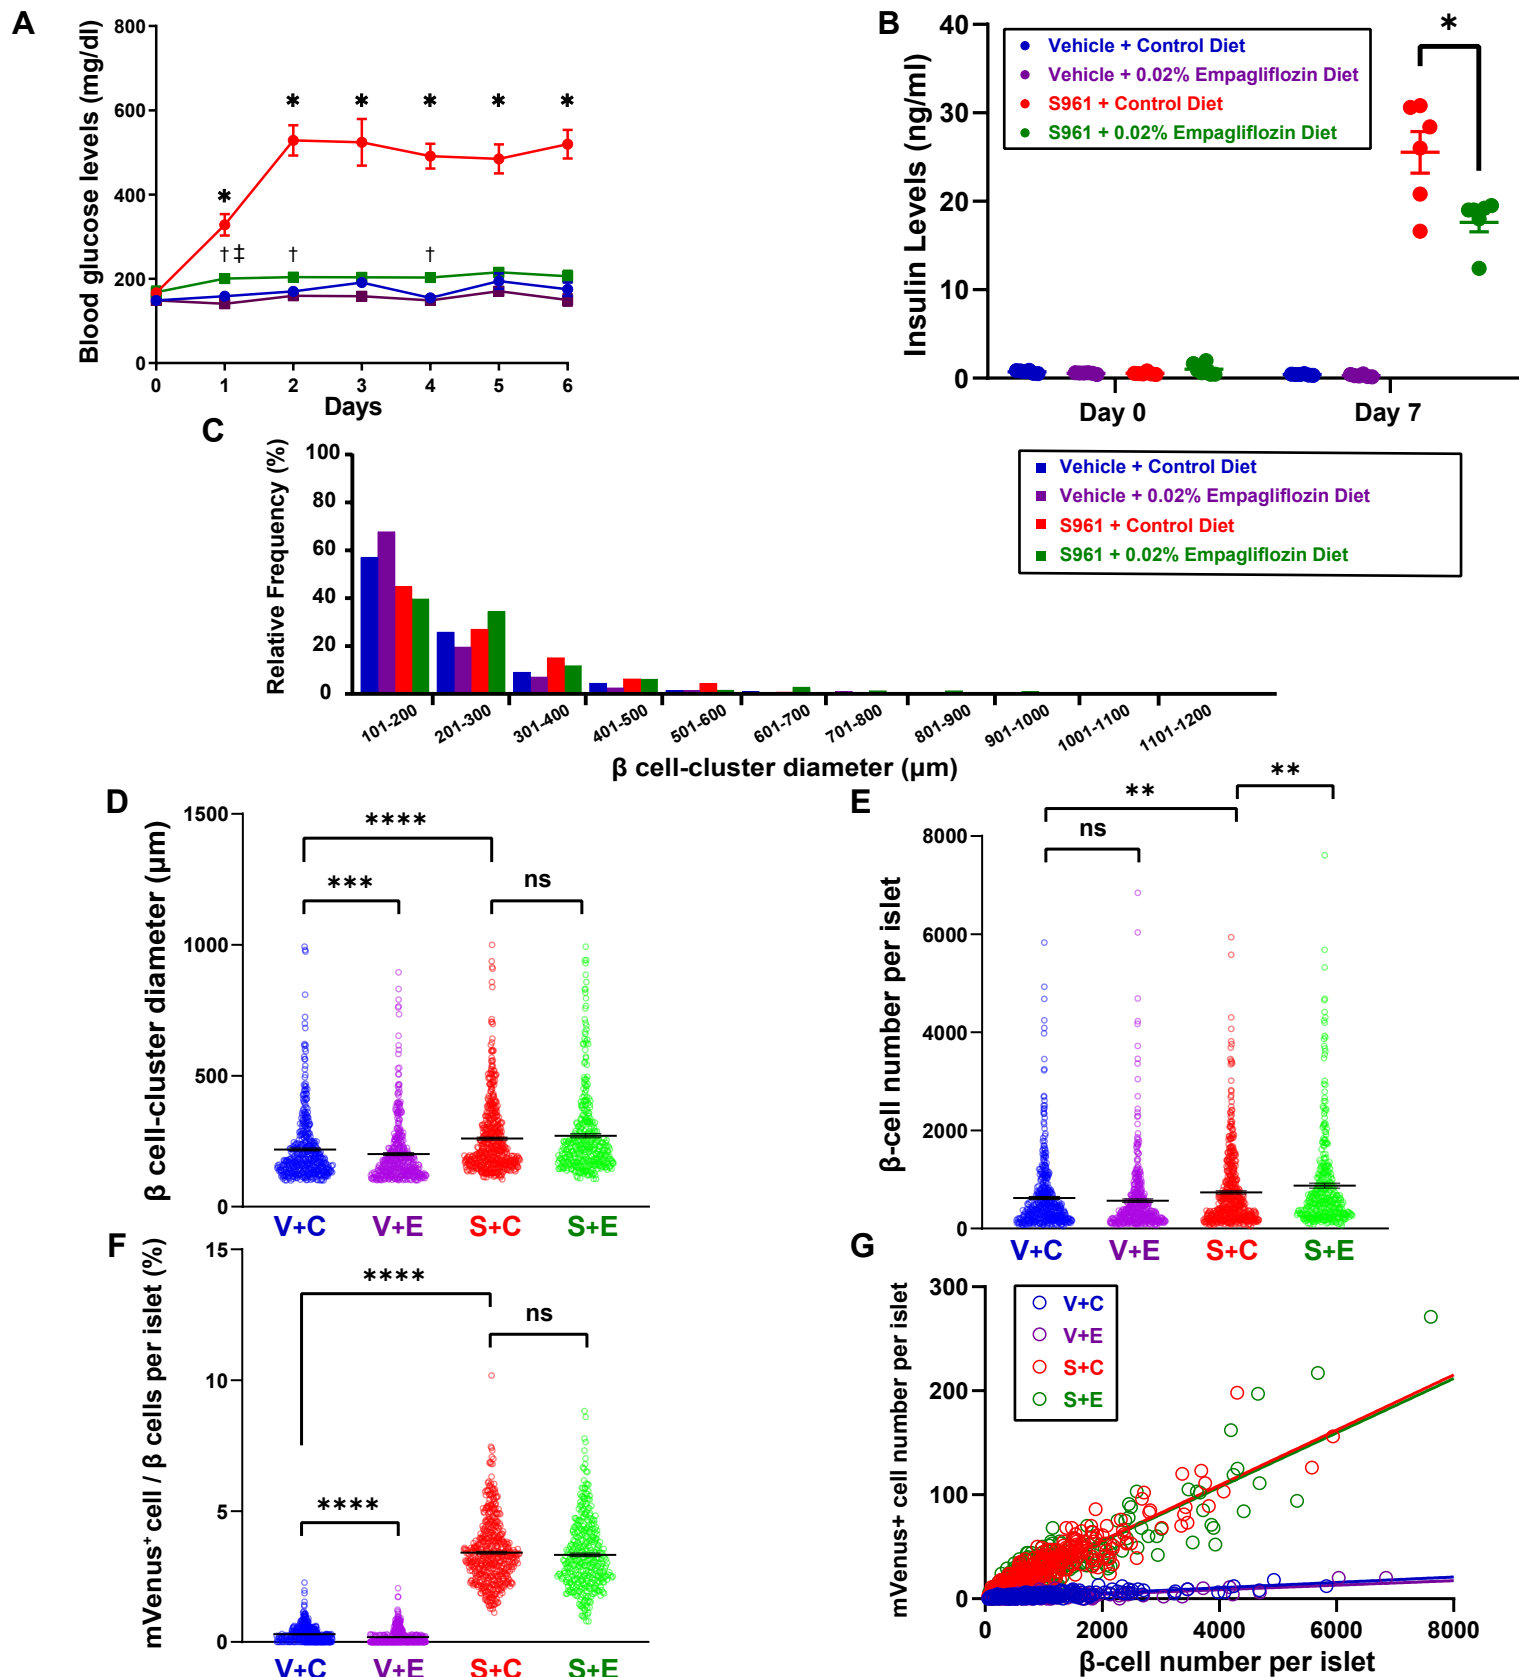

**Figure S3. S961-induced  $\beta$ -cell proliferation is not mediated by hyperglycemia.** (A, B) RIP-Cre;Fucci2aR mice were divided into four groups: 1) vehicle + control, treated with vehicle and fed control diet (N = 6); 2) vehicle + 0.02% empagliflozin, treated with vehicle and fed a diet supplemented with 0.02% empagliflozin (N = 6); 3) S961 + control, treated with S961 (10 nmol/week) and fed control diet (N = 6); and 4) S961 + 0.02% empagliflozin, treated with S961 (10 nmol/week) and fed a diet supplemented with 0.02% empagliflozin (N = 6). (A) Arbitrary blood glucose levels. \* $P < 0.05$ , S961 + control diet group vs. S961 + 0.02% empagliflozin group. † $P < 0.05$ , S961 + 0.02% empagliflozin group vs. vehicle + control group. ‡ $P < 0.05$ , vehicle + control group vs. vehicle + 0.02% empagliflozin group. (B) Serum insulin levels at the end of the 7-day treatment. \* $P < 0.05$ , S961 + control group vs. S961 + 0.02% empagliflozin group. (C) Histogram of  $\beta$ -cell cluster diameter. Morphometric analysis was performed on islets harboring  $\beta$ -cell clusters with diameter  $> 100 \mu\text{m}$  (vehicle + control, N = 4 mice, n = 496 islets; vehicle + 0.02% empagliflozin, N = 4 mice, n = 440 islets; S961 + control, N = 4 mice, n = 544 islets; S961 + 0.02% empagliflozin, N = 4 mice, n = 391 islets). (D)  $\beta$ -Cell cluster diameter, (E) number of  $\beta$ -cells per islet, and (F) percentage of mVenus+ cells per islet. \*\* $P < 0.01$  (N = 4), \*\*\* $P < 0.001$  (N = 4), \*\*\*\* $P < 0.0001$  (N = 4); ns, not significant. (G) Correlation between number of mVenus+ cells and number of  $\beta$ -cells per islet. mVenus+ cell and  $\beta$ -cell number per islet were strongly correlated in all groups (vehicle + control,  $r = 0.70$ ,  $P < 0.0001$ ; vehicle + 0.02% empagliflozin diet,  $r = 0.61$ ,  $P < 0.0001$ ; S961 + control diet,  $r = 0.93$ ,  $P < 0.0001$ ; and S961 + 0.02% empagliflozin diet,  $r = 0.88$ ,  $P < 0.0001$ ). V + C, vehicle + control; V + E, vehicle + 0.02% empagliflozin diet; S + C, S961 + control diet; S + E, S961 + 0.02% empagliflozin diet. Data are presented as mean  $\pm$  SEM.
