# Supplementary material
Source: publisher figshare collection journal article supplement (https://diabetesjournals.figshare.com/articles/dataset/_/12753533)
Supplement: Supplementary file 4 [file 1]

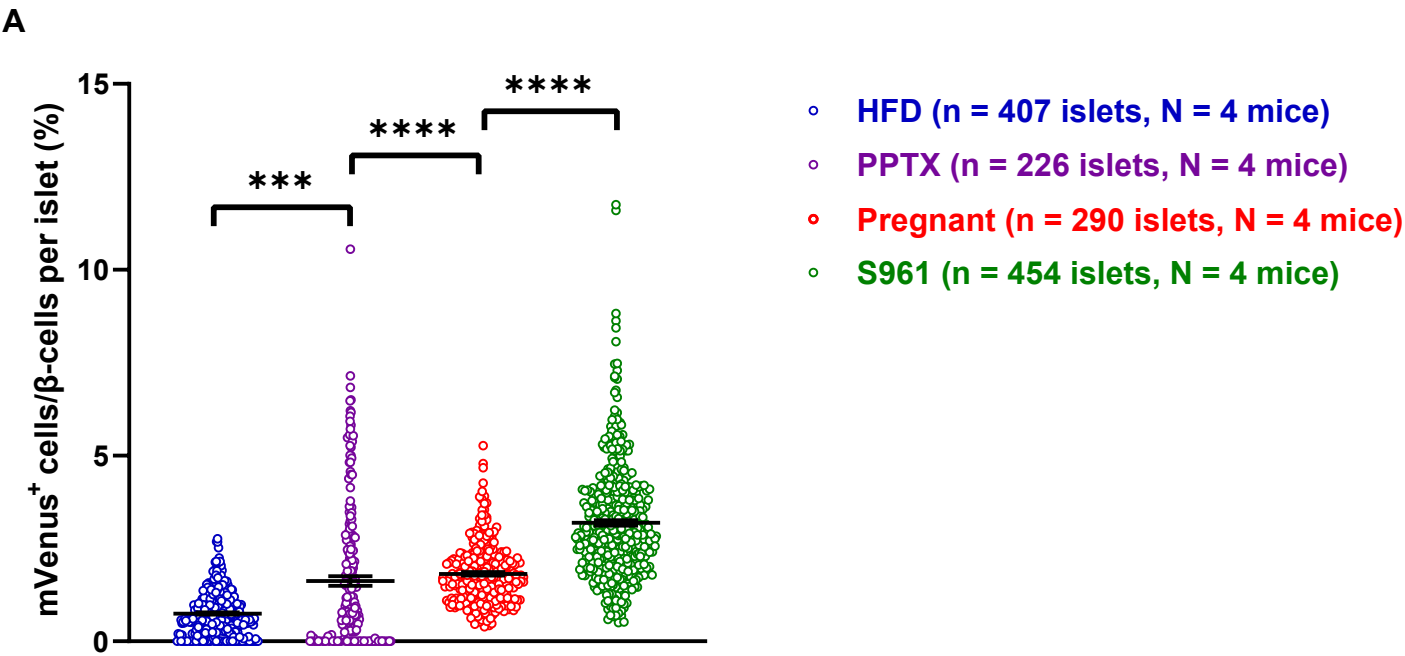

**Online Supplemental Figure 4.** Comparison of β-cell proliferation rate among S961 treatment, pregnancy, pancreatectomy (PPTX), and high fat diet (HFD) models.
