# Supplementary material
Source: publisher figshare collection journal article supplement (https://diabetesjournals.figshare.com/articles/dataset/_/12753533)
Supplement: Supplementary file 5 [file 1]

Online Supplemental Figure 5.

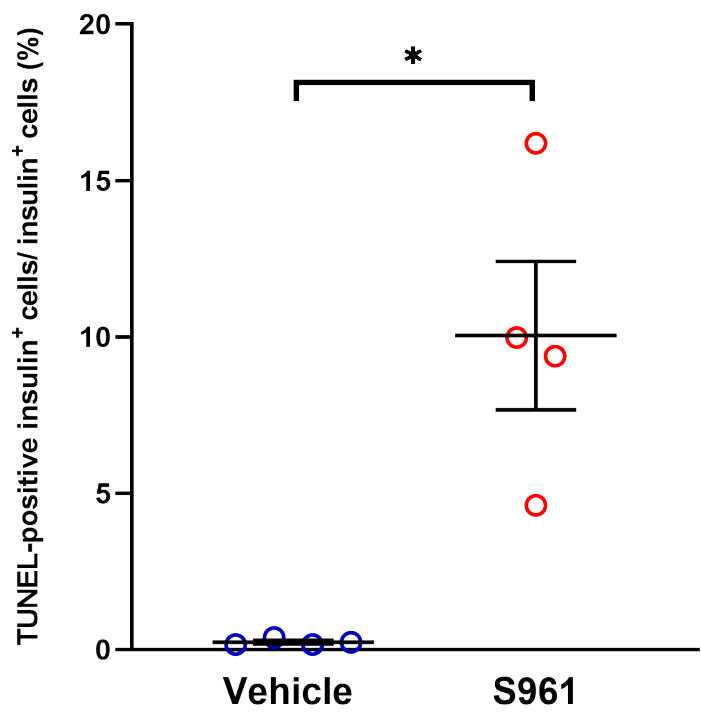

**Online Supplemental Figure 5. Quantification of TUNEL+ insulin+ DAPI+ cells in RIP-Cre;R26Fucci2aR mice following vehicle (N = 4) or S961 treatment (N = 4).**

TUNEL+ insulin+ DAPI+ cells were counted using Metamorph software. The percentage of TUNEL+ insulin+ DAPI+ cells per each mouse was presented. \*P < 0.05. Data are presented as mean ± SEM.
