# Supplementary material
Source: publisher figshare collection journal article supplement (https://diabetesjournals.figshare.com/articles/dataset/_/12753533)

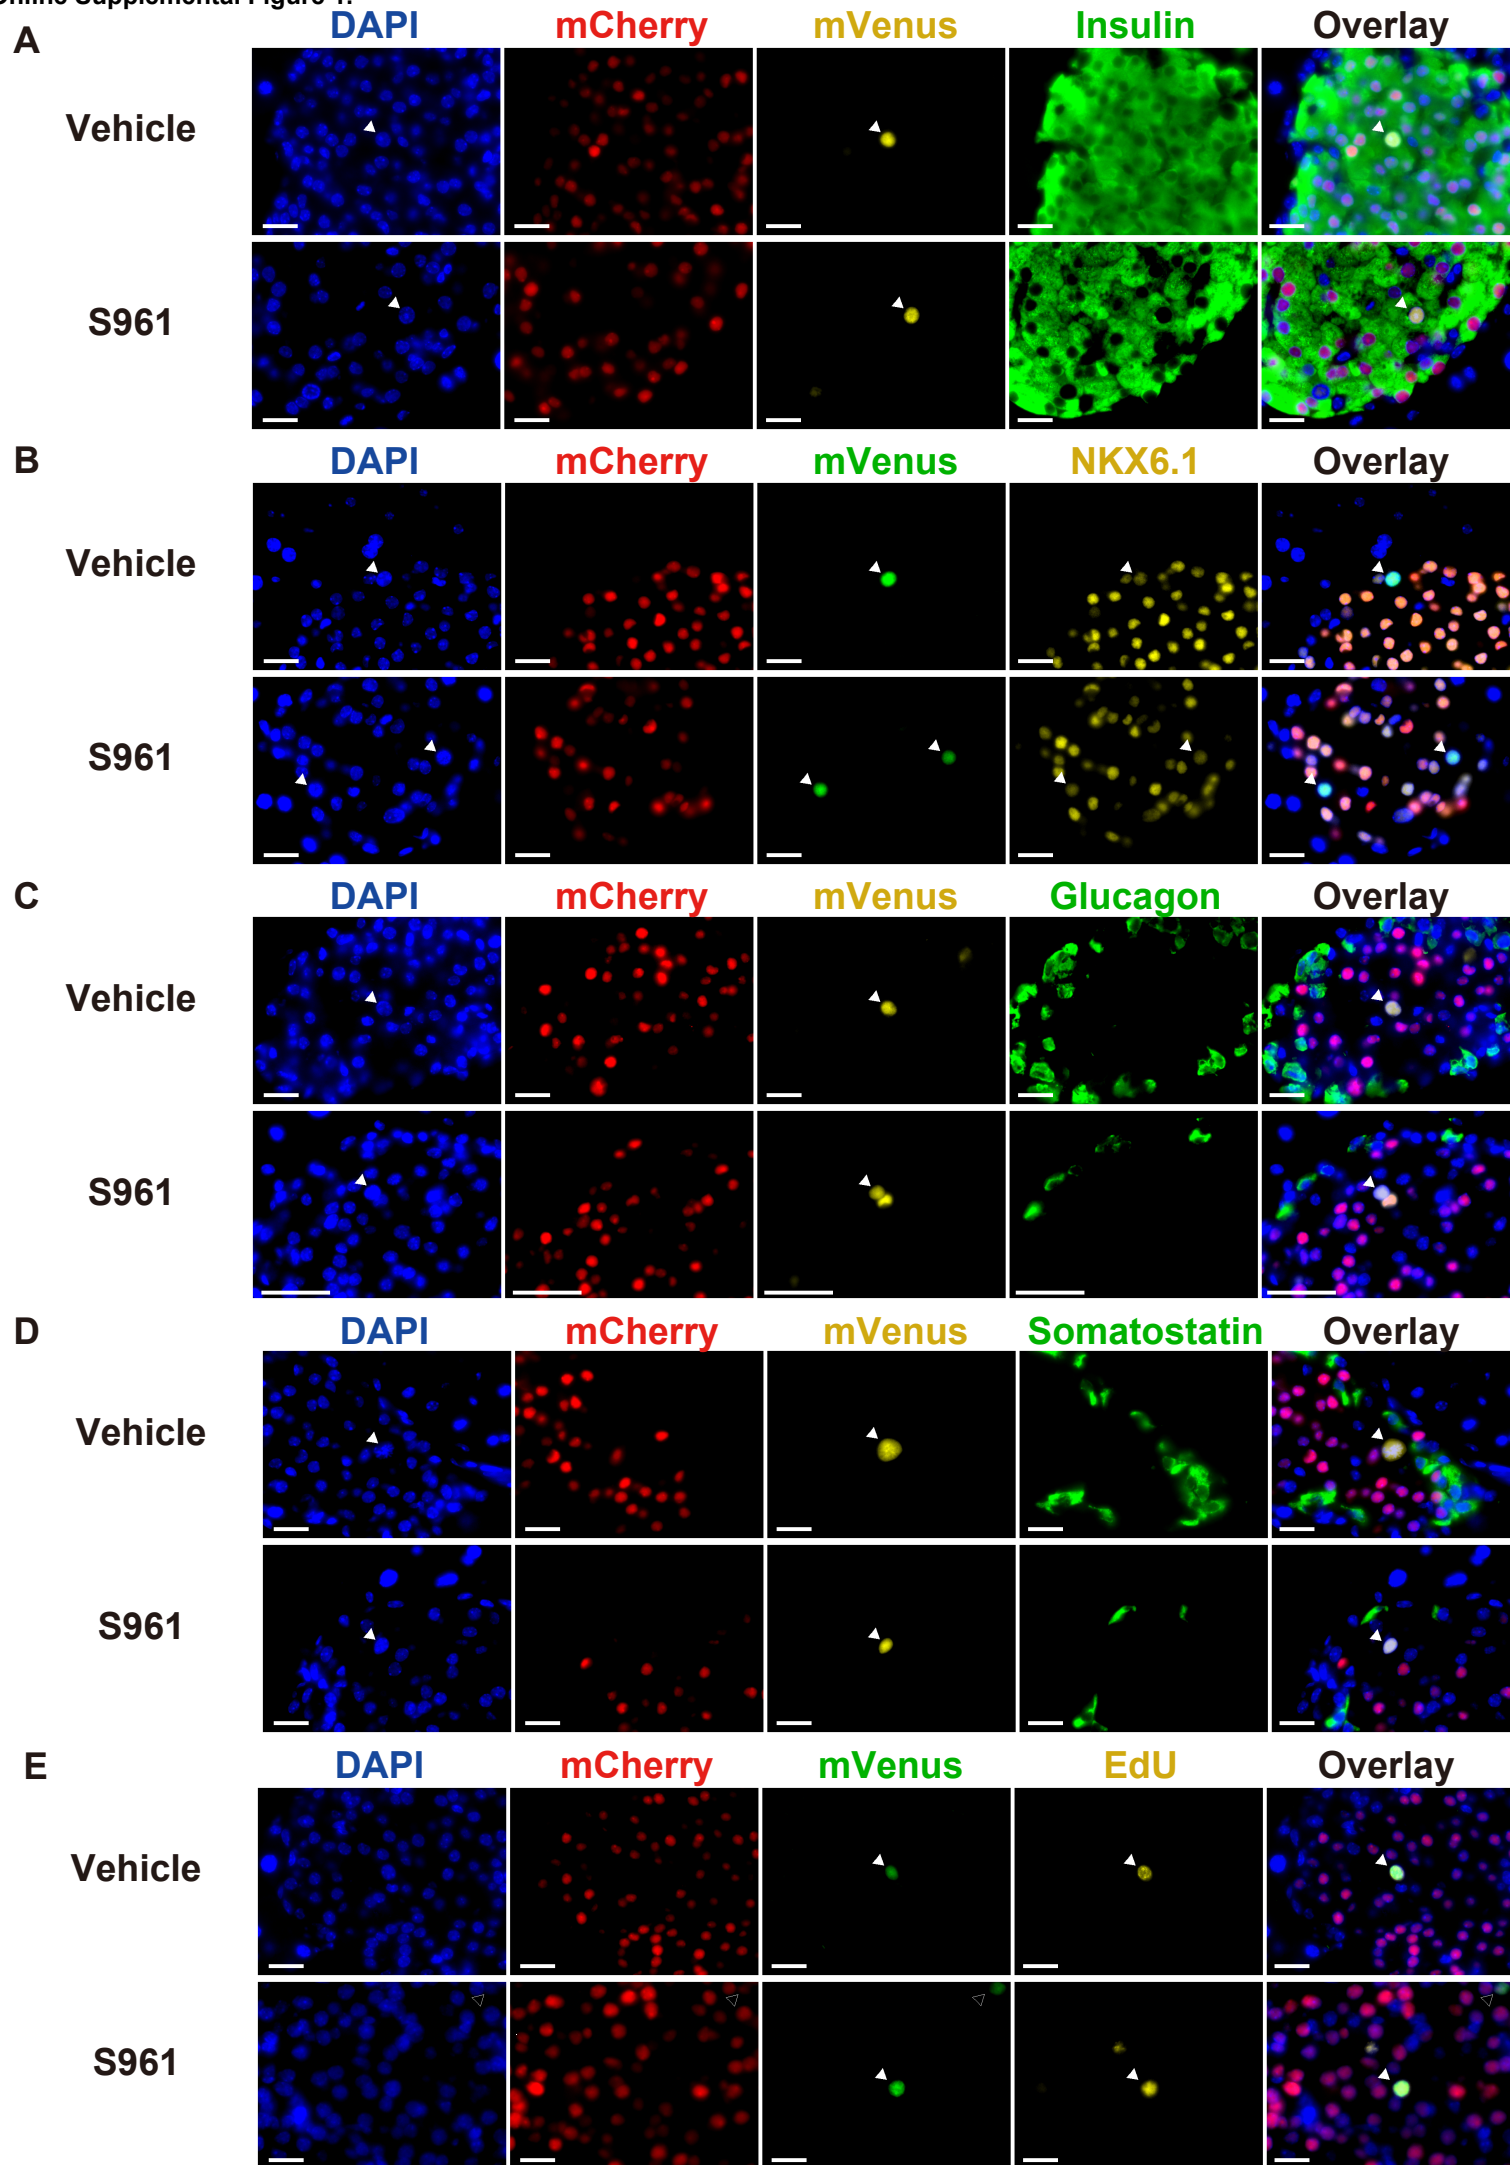

Online Supplemental Figure 1. High magnification images ( $\times 100$ ) of Figure 1. Scale bar, 20  $\mu\text{m}$ .

Supplement: Supplementary file 3 [file 1]
